# Supplementary material for: High temperature sodium batteries: status, challenges and future trends
Source: Royal Society of Chemistry journal article supplement (doi:10.1039/c3ee24086j), 2013-01-01
Supplement: c3ee24086j.pdf [file c3ee24086j.pdf]

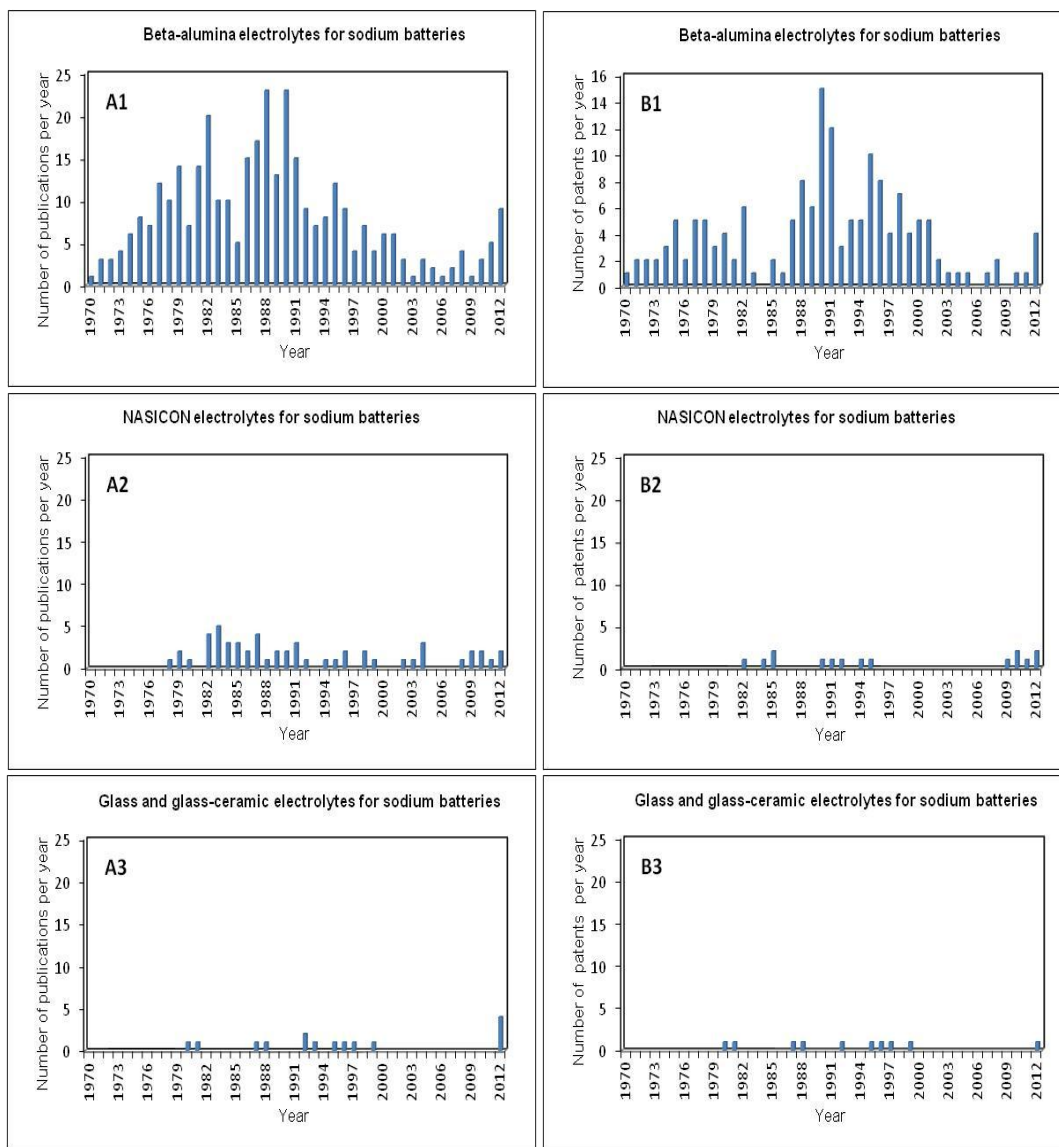

**Figure S 1.** A) Number of scientific publications about inorganic solid electrolytes: Beta-alumina (A1), NASICON (A2), glass and glass-ceramic (A3). B) Number of patents about inorganic solid electrolytes: Beta-alumina (B1), NASICON (B2), glass and glass-ceramic (B3). Source: Scifinder Scholar™ 2012.
